# Supplementary material for: Dose Selection for an Adjuvanted Respiratory Syncytial Virus F Protein Vaccine for Older Adults Based on Humoral and Cellular Immune Responses
Source: PubMed Central journal article supplement (PMC5585697; doi:10.1128/cvi.00157-17), 2017-09-05
Supplement: CVI.00157-17_zcd999095513s1.pdf [file CVI.00157-17_zcd999095513s1.pdf]

## **Supplementary figure legends**

**Supplementary Figure 1.** CONSORT diagram for phase 1b study of an adjuvanted RSV vaccine. GLA = glucopyranosyl lipid A; IIV = inactivated influenza vaccine; LTFU = lost to follow-up; sF = soluble F protein; WD = withdrew.

**Supplementary Figure 2.** Immune responses in subjects in cohorts 2 and 3 who received RSV vaccine with placebo (solid bars) or with IIV (hatched bars). A) Microneutralizing antibody on day 29; top figure, geometric mean titers; bottom figure, geometric mean fold rises from baseline. B) F-specific interferon-gamma ELISPOT assay on day 8; top figure, geometric mean counts; bottom figure, geometric mean fold rises from baseline. CI = confidence interval; GLA-SE = glucopyranosyl lipid A in 2% stable emulsion; IIV = inactivated influenza; PBMC = peripheral blood mononuclear cells; RSV = respiratory syncytial virus; sF = soluble F protein; SFC = spot-forming cells.

**Supplementary Figure 3.** Effect of baseline on A) day 29 microneutralizing antibody titers, B) day 8 F-specific IFN- $\gamma$  T cell ELISPOT counts; C) day 29 fold rise in microneutralizing antibodies, and D) day 8 fold rise in F-specific IFN- $\gamma$  T cell ELISPOT counts. CI = confidence interval; GLA-SE = glucopyranosyl lipid A in 2% stable emulsion; IIV = inactivated influenza; RSV = respiratory syncytial virus; sF = soluble F protein.

Supplementary Figure 1.

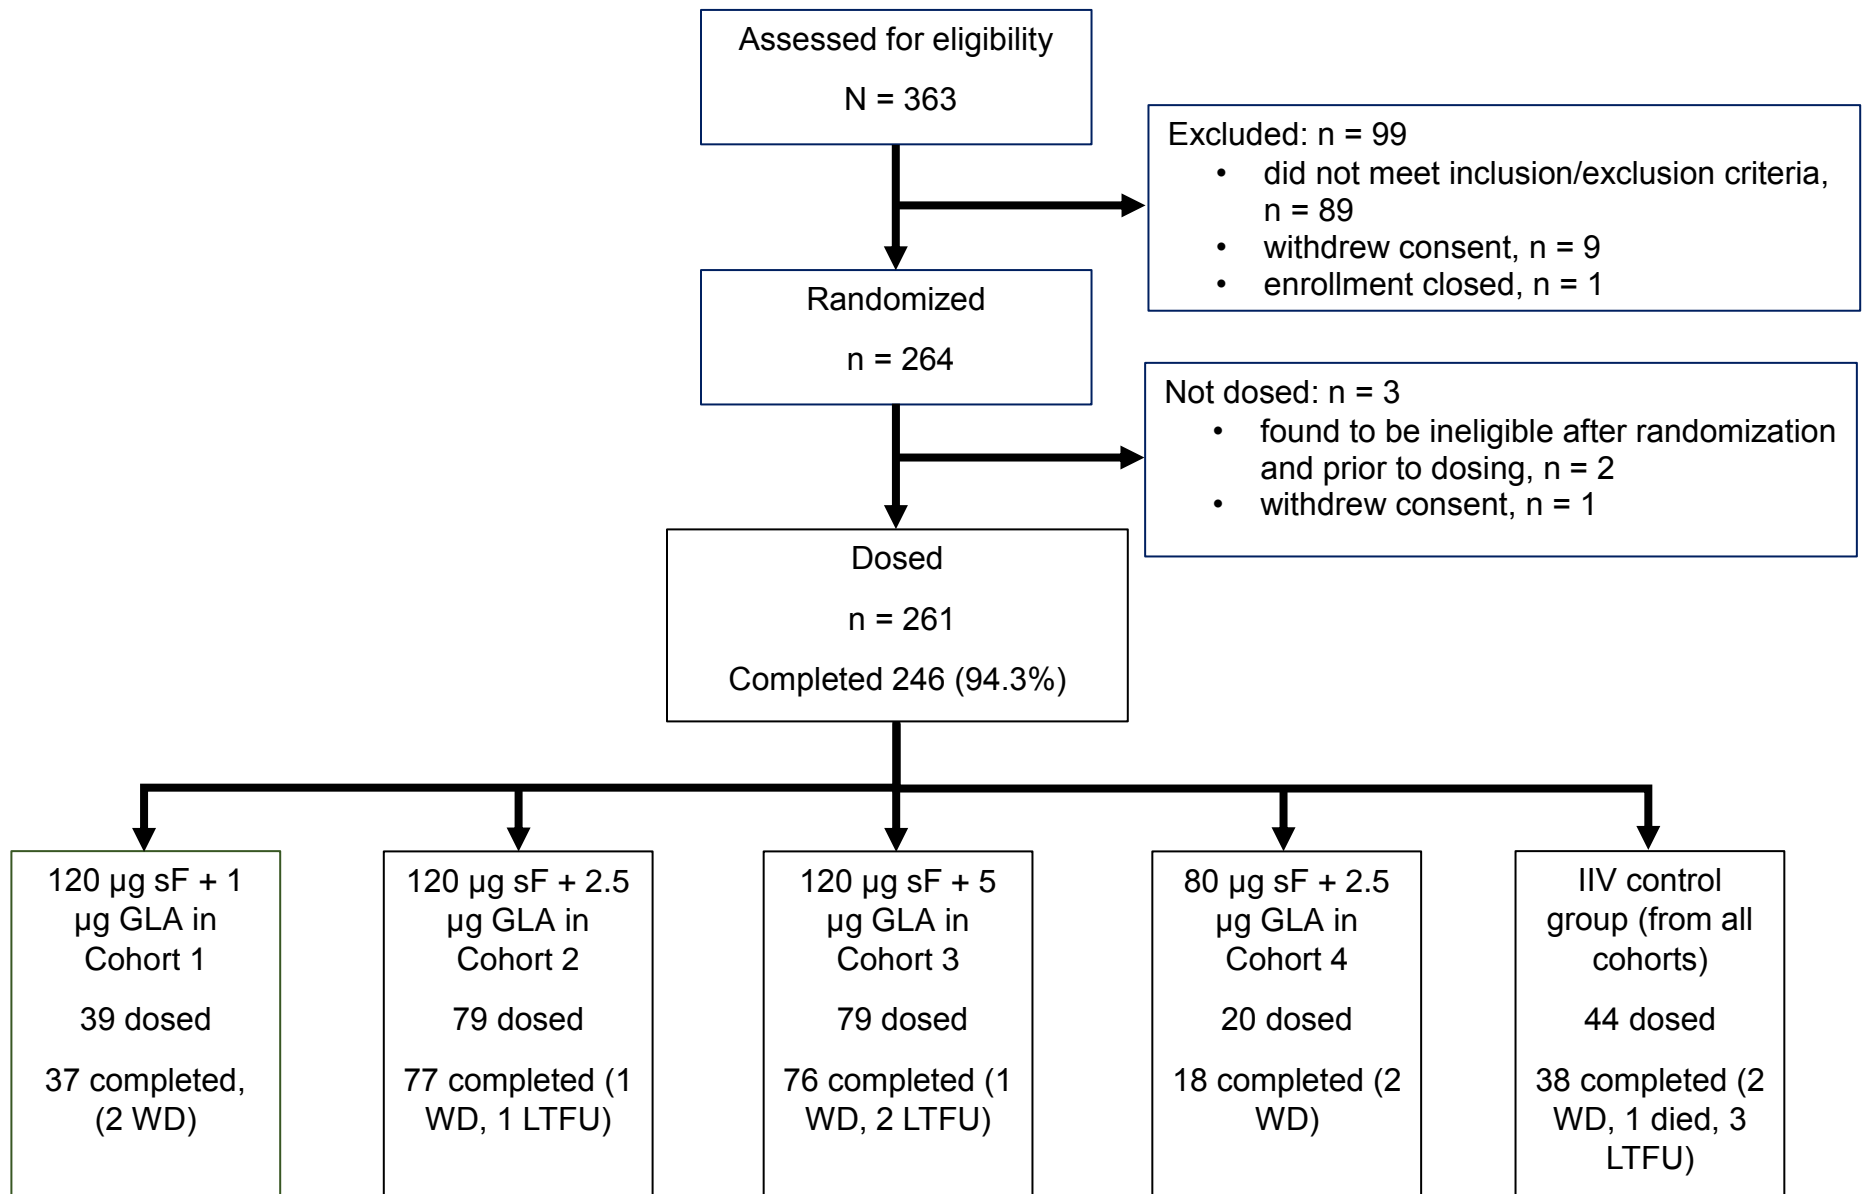

Supplementary Figure 2.

A.

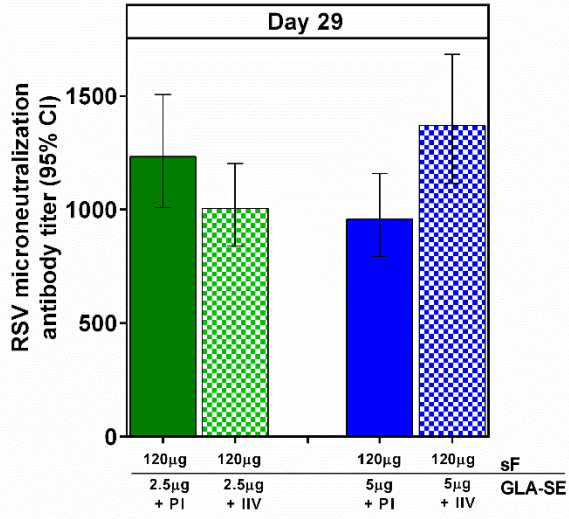

B.

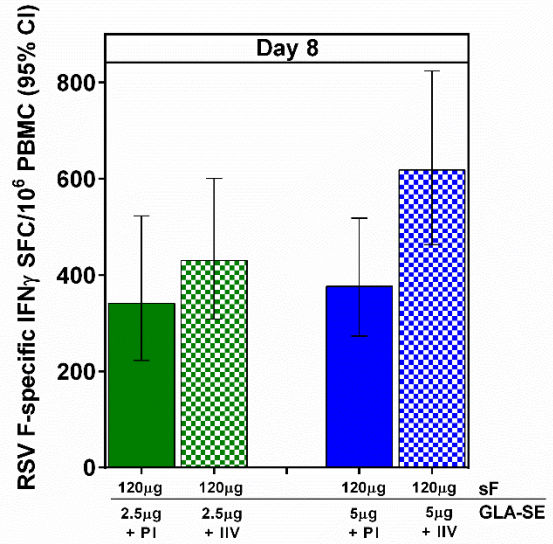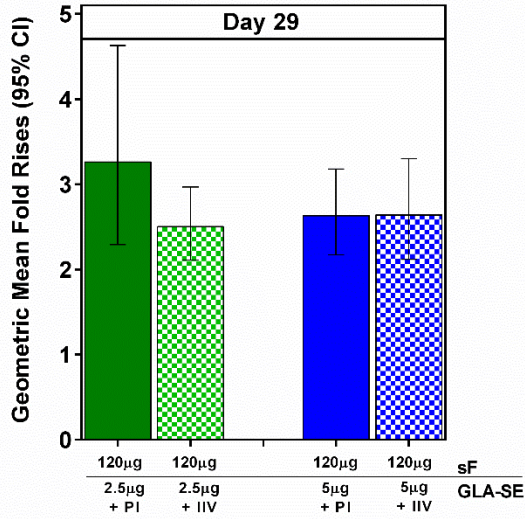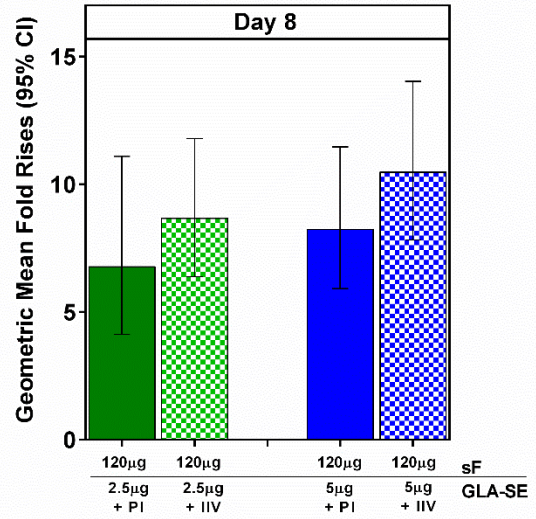

Supplementary Figure 3.

A.

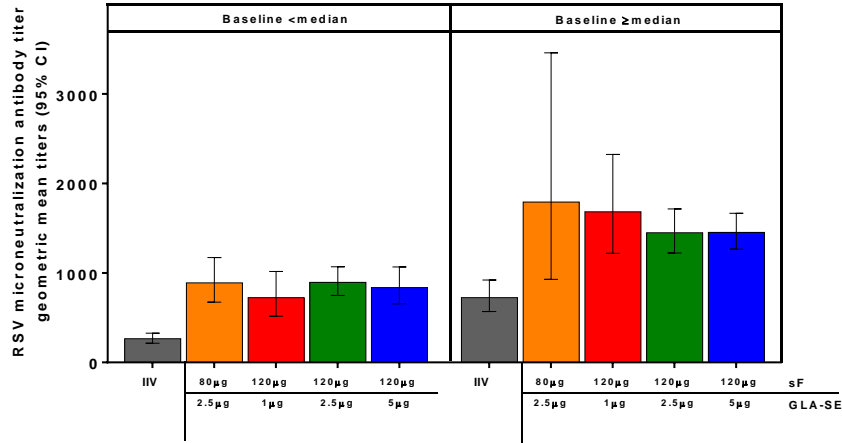

B.

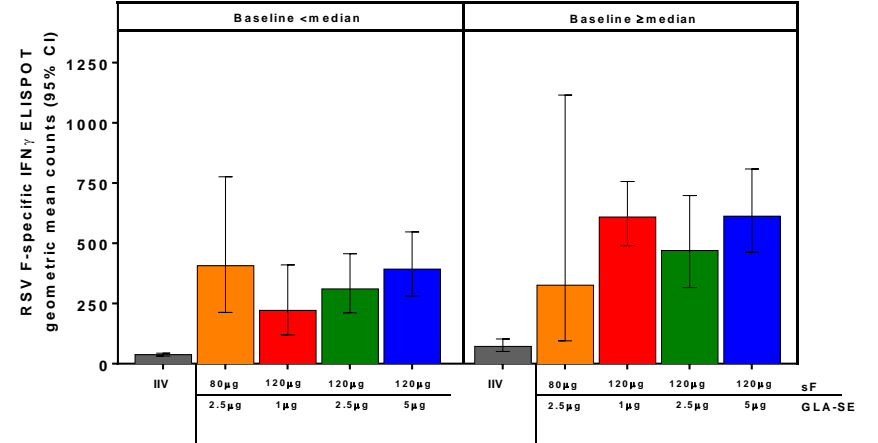

C.

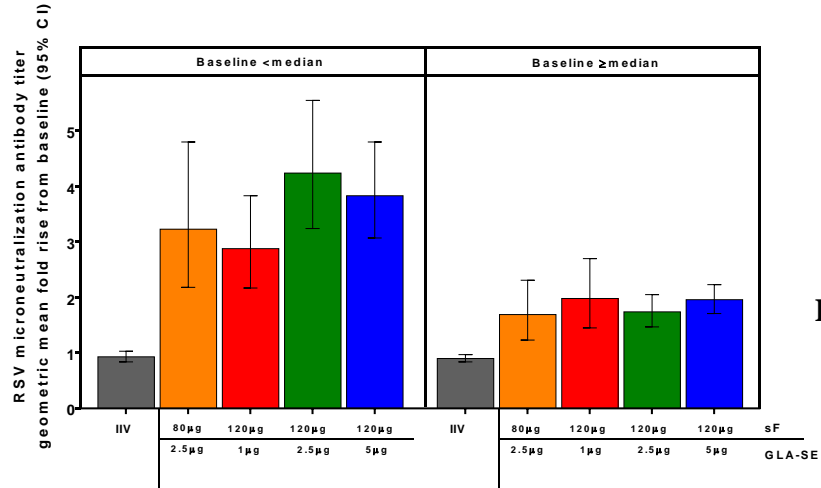

D.

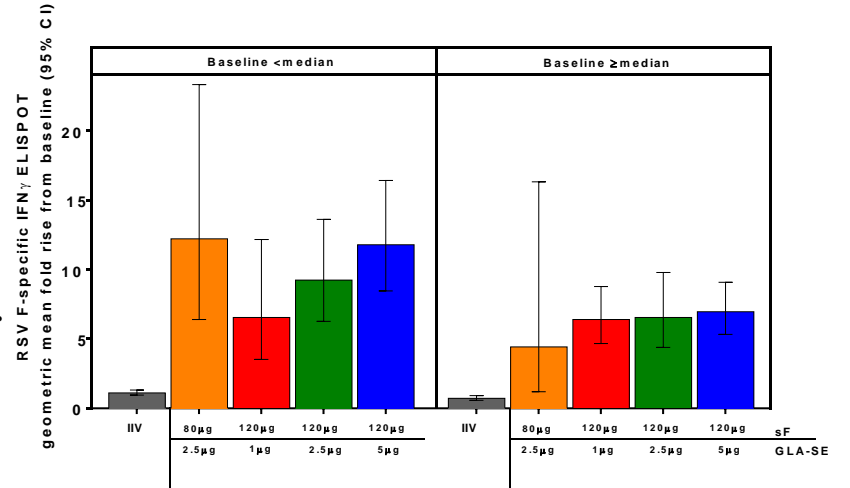

**Supplementary Table 1.** Demographics of subjects dosed.

| <b>Characteristic</b>             | <b>IIV</b>                     | <b>Cohort 4</b>              | <b>Cohort 1</b>             | <b>Cohort 2</b>                                            | <b>Cohort 3</b>                                          | <b>Total</b>   |
|-----------------------------------|--------------------------------|------------------------------|-----------------------------|------------------------------------------------------------|----------------------------------------------------------|----------------|
|                                   | <b>(Alone or with placebo)</b> | <b>80 µg sF + 2.5 µg GLA</b> | <b>120 µg sF + 1 µg GLA</b> | <b>120 µg sF + 2.5 µg GLA (with either IIV or placebo)</b> | <b>120 µg sF + 5 µg GLA (with either IIV or placebo)</b> |                |
|                                   | <b>N = 44</b>                  | <b>N = 20</b>                | <b>N = 39</b>               | <b>N = 79</b>                                              | <b>N = 79</b>                                            | <b>N = 261</b> |
| Median age (range), y             | 67 (60, 91)                    | 67 (60, 80)                  | 69 (60, 86)                 | 68 (60, 86)                                                | 70 (60, 89)                                              | 68 (60, 91)    |
| Age >69, y (%)                    | 34.1                           | 40                           | 48.7                        | 36.7                                                       | 50.6                                                     | 42.5           |
| Male, (%)                         | 43.2                           | 35.0                         | 46.2                        | 41.8                                                       | 53.2                                                     | 45.6           |
| Hispanic or Latino ethnicity, (%) | 15.9                           | 25.0                         | 33.3                        | 12.7                                                       | 16.5                                                     | 18.4           |
| Race                              |                                |                              |                             |                                                            |                                                          |                |
| Black or African American         | 6.8                            | 5.0                          | 5.1                         | 5.1                                                        | 3.8                                                      | 5.0            |
| Other                             | 2.3                            | 5.0                          | 0                           | 3.8                                                        | 1.3                                                      | 1.5            |
| White                             | 90.9                           | 90.0                         | 94.9                        | 91.1                                                       | 94.9                                                     | 92.7           |

GLA = glucopyranosyl lipid A; IIV = inactivated influenza vaccine; sF = soluble respiratory syncytial fusion protein.

Other includes subjects not in listed categories, including if multiple categories checked.

**Supplementary Table 2.** Systemic solicited symptoms reported during days 1 to 7.

|                                    |                       |                          |                         | <b>Cohort 2</b>            | <b>Cohort 3</b>            |
|------------------------------------|-----------------------|--------------------------|-------------------------|----------------------------|----------------------------|
|                                    |                       |                          |                         | <b>120 µg sF + 2.5 µg</b>  | <b>120 µg sF + 5 µg</b>    |
|                                    |                       |                          |                         | <b>GLA</b>                 | <b>GLA</b>                 |
|                                    | <b>IIV</b>            | <b>Cohort 4</b>          | <b>Cohort 1</b>         | <b>(with either IIV or</b> | <b>(with either IIV or</b> |
|                                    | <b>(Alone or with</b> | <b>80 µg sF + 2.5 µg</b> | <b>120 µg sF + 1 µg</b> | <b>placebo)</b>            | <b>placebo)</b>            |
|                                    | <b>placebo)</b>       | <b>GLA</b>               | <b>GLA</b>              |                            |                            |
|                                    | <b>N = 44</b>         | <b>N = 20</b>            | <b>N = 39</b>           | <b>N = 78</b>              | <b>N = 78</b>              |
| <b>Solicited Symptom</b>           | <b>n (%)</b>          | <b>n (%)</b>             | <b>n (%)</b>            | <b>n (%)</b>               | <b>n (%)</b>               |
| Any solicited symptom <sup>a</sup> | 28 (63.6)             | 12 (60.0)                | 14 (35.9)               | 52 (66.7)                  | 56 (71.8)                  |
| Any systemic solicited symptom     | 11 (25.0)             | 6 (30.0)                 | 10 (25.6)               | 23 (29.5)                  | 22 (28.2)                  |
| Fatigue/tiredness                  | 8 (18.2)              | 3 (15.0)                 | 4 (10.3)                | 18 (23.1)                  | 18 (23.1)                  |
| Generalized muscle aches           | 4 (9.1)               | 0                        | 7 (17.9)                | 8 (10.3)                   | 10 (12.8)                  |
| Headache                           | 9 (20.5)              | 4 (20.0)                 | 6 (15.4)                | 9 (11.5)                   | 6 (7.7)                    |
| Fever $\geq 38$ °C                 | 0                     | 0                        | 0                       | 0                          | 2 (2.6)                    |

GLA = glucopyranosyl lipid A; IIV = inactivated influenza vaccine; sF = soluble respiratory syncytial fusion protein.

Subjects were counted once for each solicited symptom regardless of the number of events.

<sup>a</sup>Any symptom includes systemic and local symptoms.

**Supplementary Table 3.** Treatment-emergent new onset chronic diseases and serious adverse events during days 1 to 361.

| Type of event             | Vaccine (s) received                   | Event <sup>a</sup>           | Subject          |              | Day of onset postdose | Relationship to study dosing |
|---------------------------|----------------------------------------|------------------------------|------------------|--------------|-----------------------|------------------------------|
|                           |                                        |                              | age (years), sex | Event grade  |                       |                              |
| New onset chronic disease | 80 µg RSV sF + 2.5 µg GLA              | Haemoglobin decreased        | 66, Male         | 1            | 216                   | Not related                  |
|                           | 120 µg RSV sF + 1 µg GLA               | Benign prostatic hyperplasia | 65, Male         | 1            | 243                   | Not related                  |
|                           | 120 µg RSV sF + 2.5 µg GLA             | Anxiety                      | 67, Female       | 1            | 207                   | Not related                  |
|                           | and IIV                                | Anxiety                      | 60, Male         | 2            | ~4 months             | Not related                  |
| Serious adverse event     | IIV + Placebo                          | Cardiac arrest               | 79, Male         | 5<br>(death) | 320                   | Not related                  |
|                           | 120 µg RSV sF + 1 µg GLA               | Rectal adenocarcinoma        | 84, Female       | 3            | 255                   | Not related                  |
|                           | 120 µg RSV sF + 2.5 µg GLA and placebo | Breast cancer female         | 62, Female       | 3            | 23                    | Not related                  |
|                           |                                        | Arthralgia                   | 75, Female       | 2            | 75                    | Not related                  |



| Type of event | Vaccine (s) received                    | Event <sup>a</sup>               | Subject          |             | Day of onset postdose | Relationship to study dosing |
|---------------|-----------------------------------------|----------------------------------|------------------|-------------|-----------------------|------------------------------|
|               |                                         |                                  | age (years), sex | Event grade |                       |                              |
|               | <b>120 µg RSV sF + 5 µg GLA and IIV</b> | Invasive ductal breast carcinoma | 69, Female       | 3           | 58                    | Not related                  |

GLA = glucopyranosyl lipid A; IIV = inactivated influenza vaccine; sF = soluble respiratory syncytial fusion protein.

RSV sF + GLA vaccines also contained 2% stable emulsion.

<sup>a</sup>Coded term, Medical Dictionary for Regulatory Activities Version 17.0, preferred term.
